# Supplementary material for: Evaluation of breeding strategies for polledness in dairy cattle using a newly developed simulation framework for quantitative and Mendelian traits
Source: PubMed Central journal article supplement (PMC4926303; doi:10.1186/s12711-016-0228-7), 2016-06-29

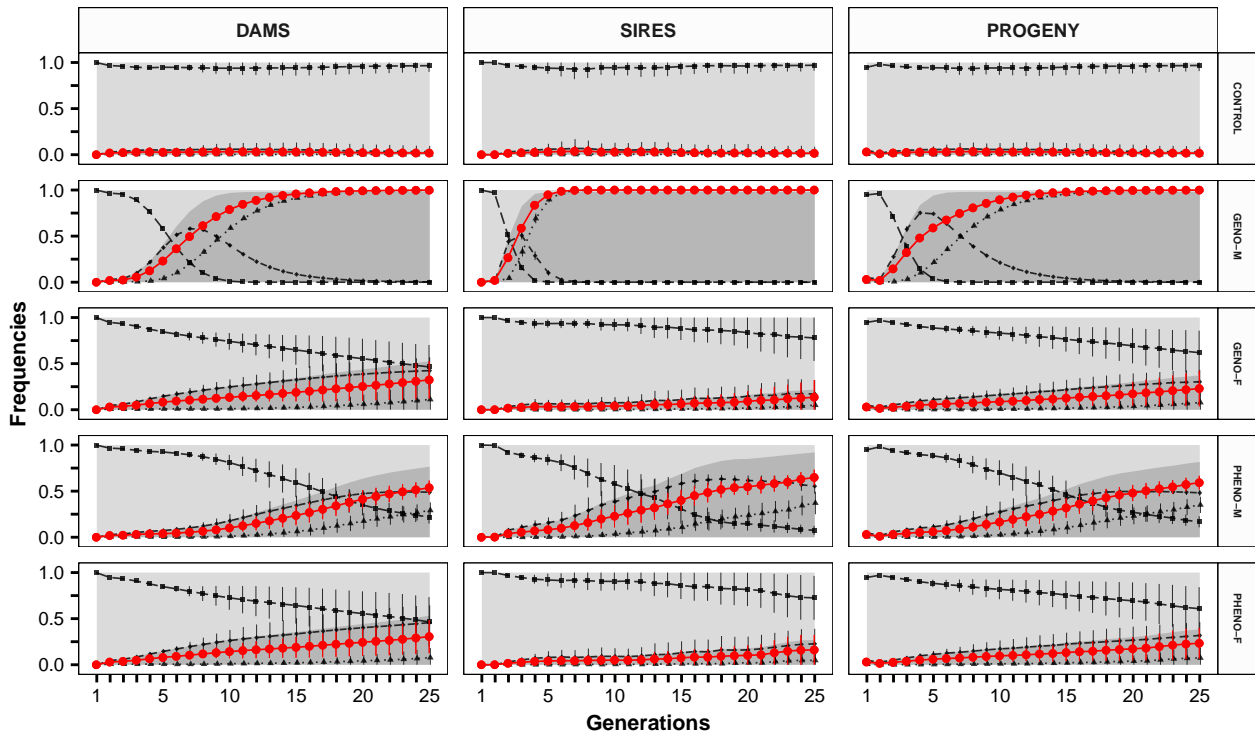

Phenotypes<sup>a</sup>

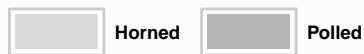

Genotype frequencies

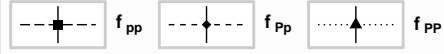

Polled allele frequency

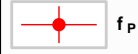

Supplement: 12711_2016_228_MOESM3_ESM.pdf [file 12711_2016_228_MOESM3_ESM.pdf]
