# Supplementary material for: Evaluation of breeding strategies for polledness in dairy cattle using a newly developed simulation framework for quantitative and Mendelian traits
Source: Springer Nature journal article supplement (doi:10.1186/s12711-016-0228-7), 2016-06-29

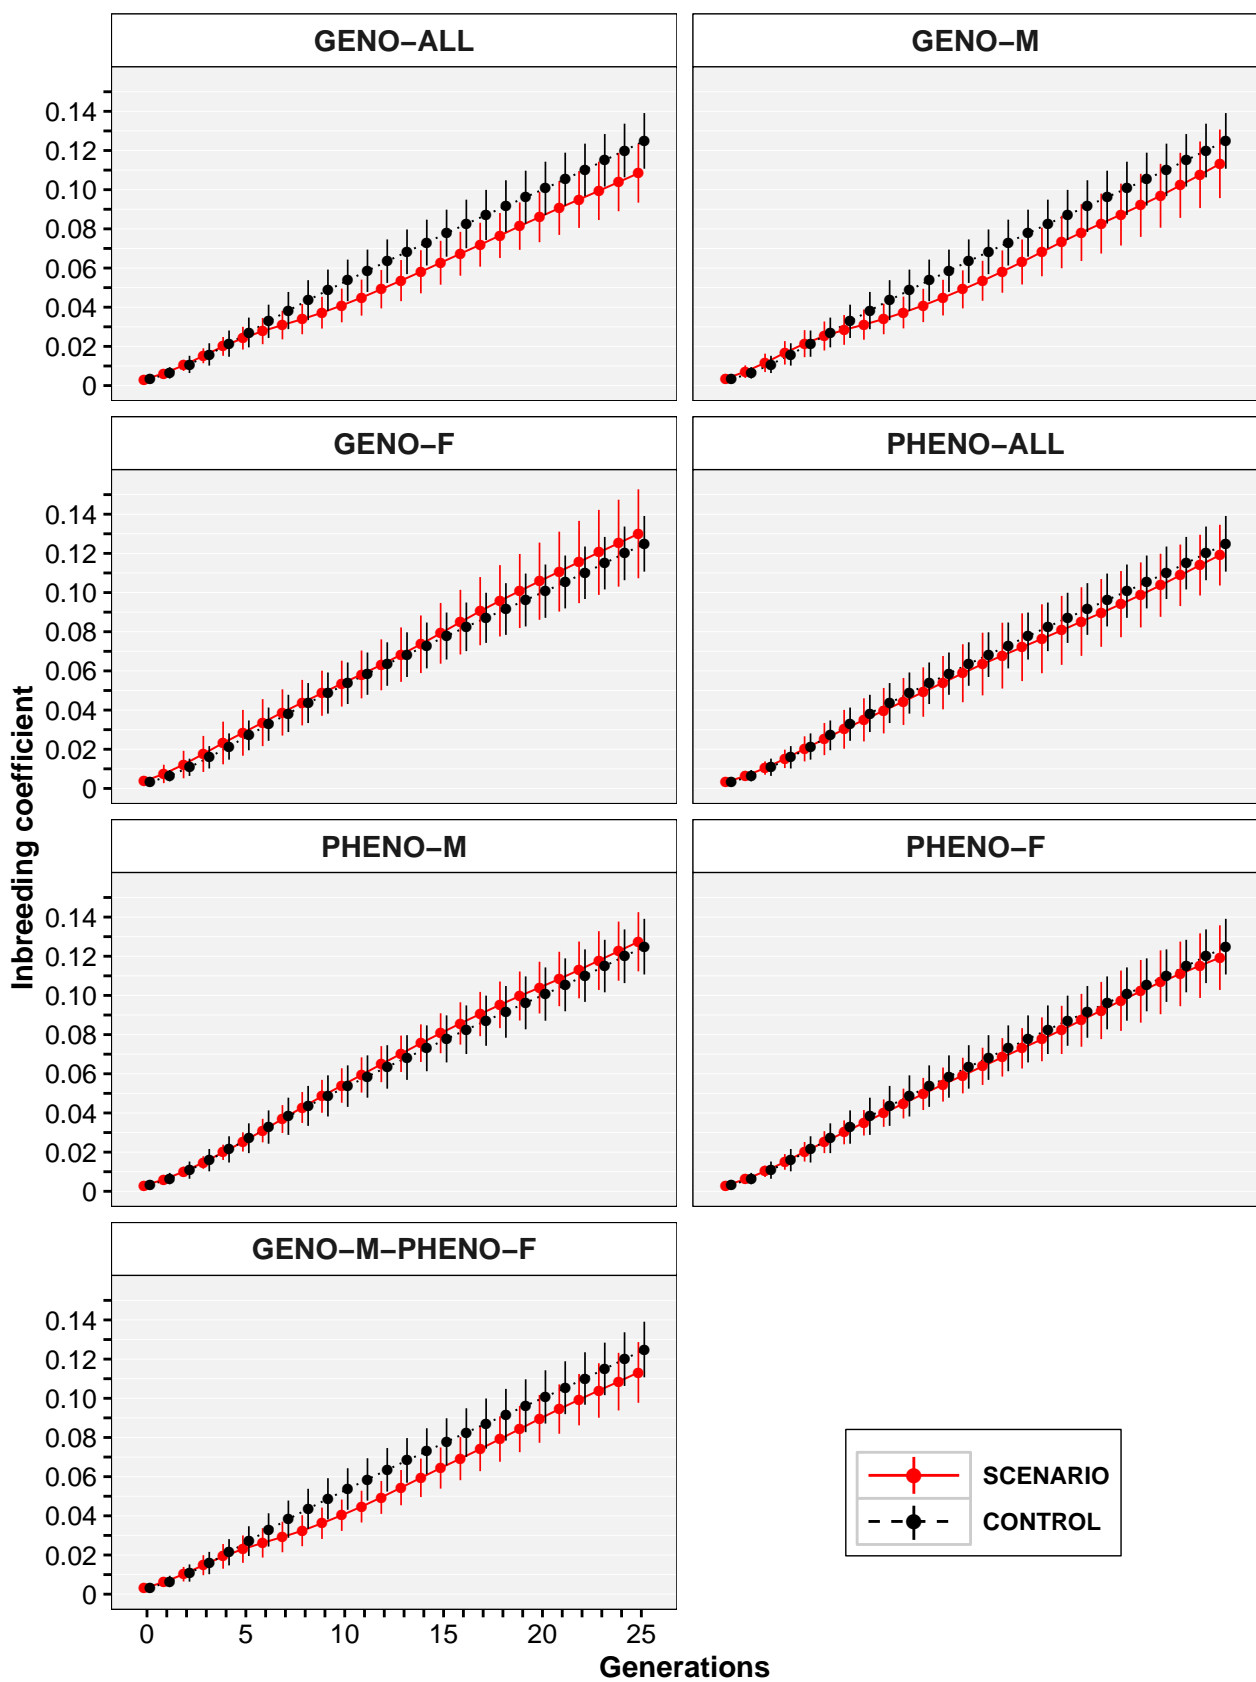

Supplement: MOESM5 [file 12711_2016_228_MOESM5_ESM.pdf]
